# Supplementary material for: Nanosheets loaded on tetrahedral surfaces form a Z-type Bi2MoO6/γ-Bi2O3 heterojunction to enhance the photocatalytic degradation activity of lomefloxacin and Rhodamine B
Source: Royal Society of Chemistry journal article supplement (doi:10.1039/d2dt02687b), 2022-01-01
Supplement: d2dt02687b1.pdf [file d2dt02687b1.pdf]

### Supplementary material

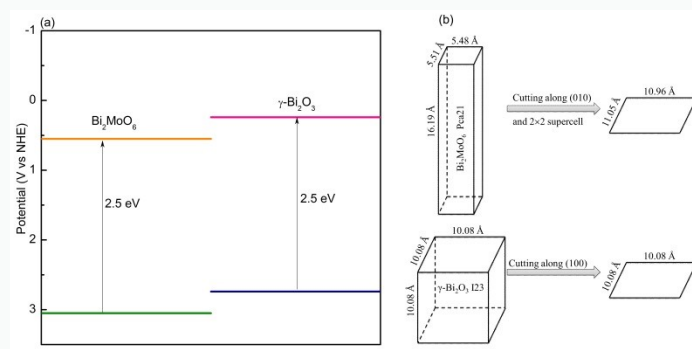

Figure S1 Energy band using the semi empirical method (a) and lattice constants (b)

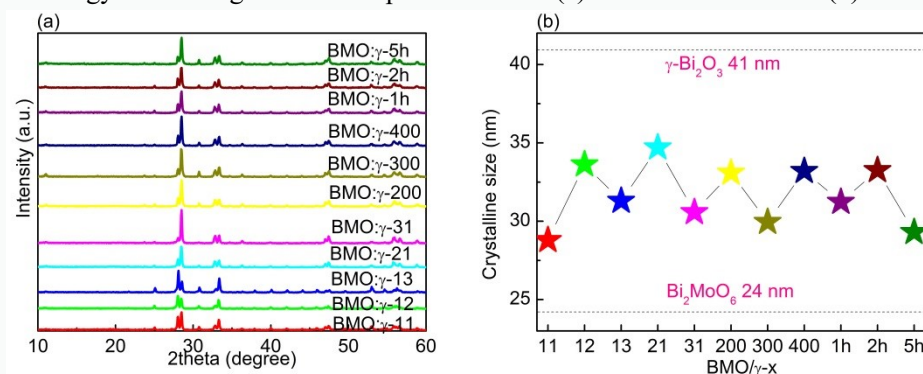

Figure S2 XRD patterns of other heterojunction sample

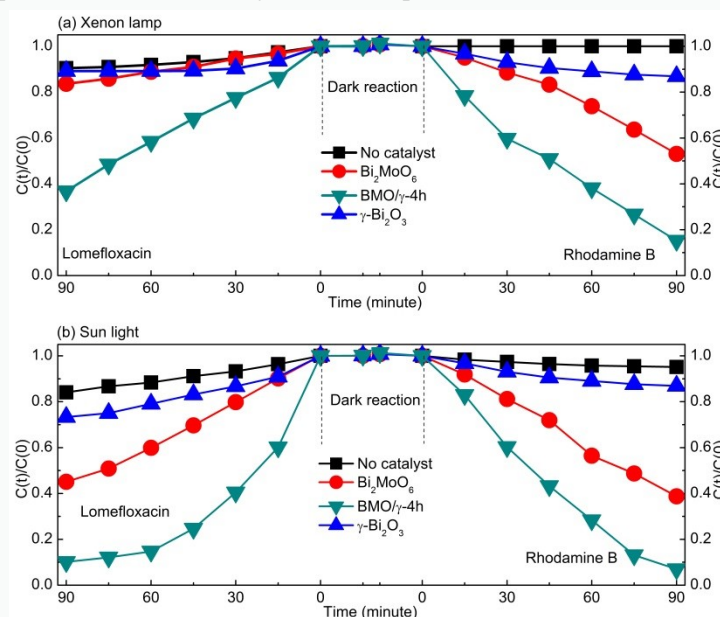

Figure S3 Photocatalytic degradation curves of lomefloxacin and rhodamine B under the irradiation of xenon lamp (a) and sun light (b)

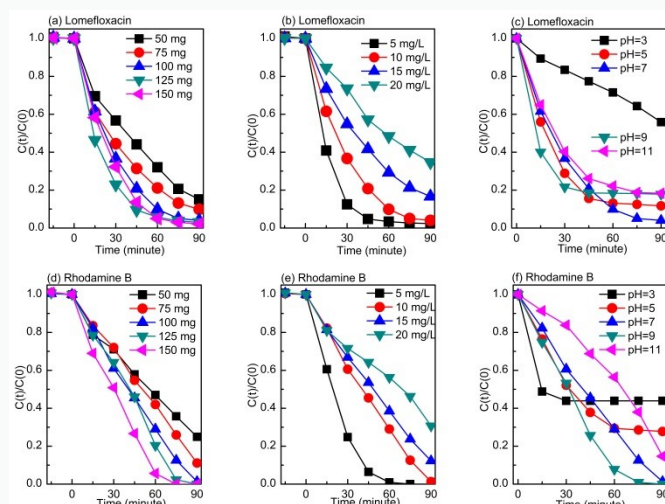

Figure S4 Degradation behaviors of the lomefloxacin (a-c) and the rhodamine B (d-f) under different conditions

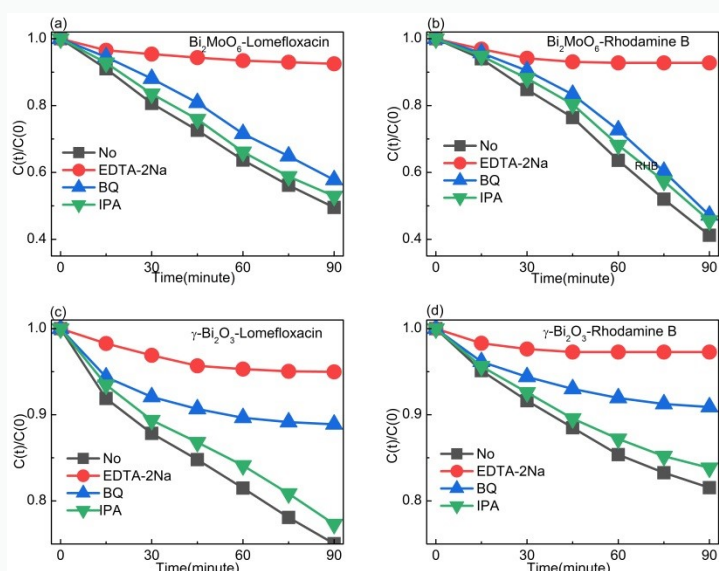

Figure S5 Sacrificial agent for  $\text{Bi}_2\text{MoO}_6$ -lomefloxacin (a),  $\text{Bi}_2\text{MoO}_6$ -rhodamine (b),  $\gamma\text{-Bi}_2\text{O}_3$ -lomefloxacin (c), and  $\gamma\text{-Bi}_2\text{O}_3$ -rhodamine (d)

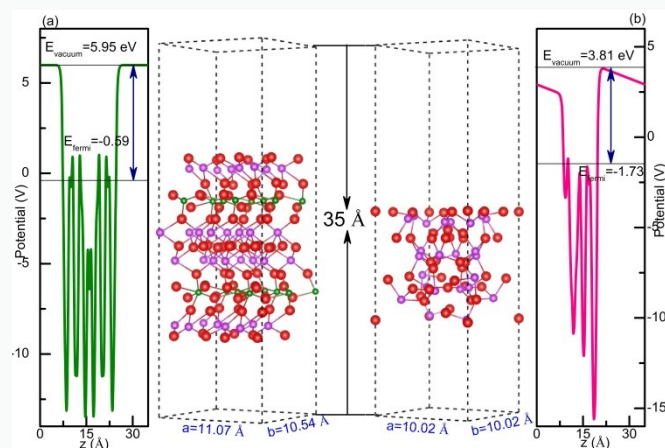

Figure S6 Surface model after optimized and electronic potential of (a)  $\text{Bi}_2\text{MoO}_6$  and (b)  $\gamma\text{-Bi}_2\text{O}_3$

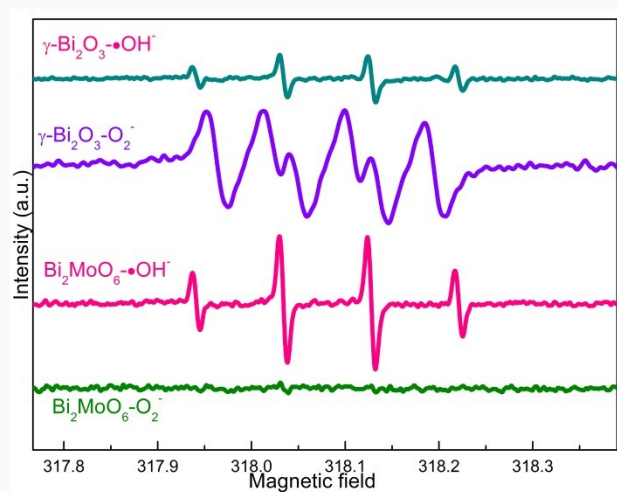

Figure S7 Radical test results of  $\text{Bi}_2\text{MoO}_6$  and  $\gamma\text{-Bi}_2\text{O}_3$  after 10 minutes light irradiation
